# Supplementary material for: Pyridinylphosphorothioate-based blue iridium(iii) complex with double chiral centers for circularly polarized electroluminescence
Source: Royal Society of Chemistry journal article supplement (doi:10.1039/d1tc00832c), 2021-01-01
Supplement: d1tc00832c1.pdf [file d1tc00832c1.pdf]

## Supporting Information (SI)

### Pyridinylphosphorothioate-based blue iridium(III) complex with double chiral centers for circularly polarized electroluminescence

Jun-Jian Lu,<sup>1,3#</sup> Zhen-Long Tu,<sup>1#</sup> Xu-Feng Luo,<sup>1</sup> Yi-Pin Zhang,<sup>1</sup> Zhong-Ze Qu,<sup>1</sup> Xiao Liang,<sup>1</sup> Zheng-Guang Wu,<sup>2\*</sup> You-Xuan Zheng<sup>1\*</sup>

<sup>1</sup>State Key Laboratory of Coordination Chemistry, Jiangsu Key Laboratory of Advanced Organic Materials, School of Chemistry and Chemical Engineering, Nanjing University, Nanjing 210093, P. R. China. E-mail: yxzheng@nju.edu.cn.

<sup>2</sup>Nantong Key Lab of Intelligent and New Energy Materials, College of Chemistry and Chemical Engineering, Nantong University, Nantong, 226019, P. R. China. E-mail: wuzhengguang\_zy@163.com.

<sup>3</sup>Hunan Provincial Key Laboratory of Fine Ceramics and Powder Materials, School of Materials and Environmental Engineering, Hunan University of Humanities, Science and Technology, Loudi, Hunan 417000, China. E-mail: lujunjian2001@126.com.

#Lu and Tu have same contribution to this paper.

## Contents

|                                                         |    |
|---------------------------------------------------------|----|
| S1. General information .....                           | 2  |
| S3. HPLC Data .....                                     | 16 |
| S4. Photo-physical and chiral optical measurement ..... | 18 |
| S5. Electrochemical measurement .....                   | 19 |
| S6. Theoretical calculation .....                       | 20 |
| S7. Thermal stability.....                              | 20 |
| S8. Devices fabrication and characterization.....       | 21 |
| S9. Reference.....                                      | 22 |

## S1. General information

$^1\text{H}$  NMR spectra were measured on Bruker AM 400 spectrometer. The high resolution electrospray ionization mass spectra (HR ESI-MS) were recorded on an Bruker MTQ III q-TOF. Thermal analysis was measured on PerkinElmer Pyris 1 DSC under nitrogen at a heating rate of  $10\text{ }^\circ\text{C min}^{-1}$ . UV-vis absorption and photoluminescence spectra were measured on Shimadzu UV-3100 and Hitachi F-4600 spectrophotometer at room temperature, respectively. Cyclic voltammetry measurement was carried out using chi600 electrochemical workstation with  $\text{Fc}^+/\text{Fc}$  as the standard at the rate of  $0.1\text{ V s}^{-1}$ , using  $\text{CH}_2\text{Cl}_2$  and tetramethylammonium hexafluorophosphate as the solvent and electrolyte salt, respectively. The decay lifetime was measured with a HORIBA Scientific 3-D fluorescence spectrometer. The circular dichroism (CD) spectra were measured on a Jasco J-810 circular dichroism spectrometer with a scan speed of  $200\text{ nm/min}$  with  $1\text{ nm}$  resolution and a respond time of  $1.0\text{ s}$ . The circularly polarized luminescence (CPL) and circularly polarized electroluminescence (CPEL) spectra were measured on a Jasco CPL-300 spectrophotometer based on ‘Continuous’ scanning mode at  $200\text{ nm/min}$  scan speed. The test mode adopts “Slit” mode with the  $E_x$  and  $E_m$  Slit width  $3000\text{ }\mu\text{m}$  and the digital integration time (D.I.T.) is  $2.0\text{ s}$  with multiple accumulations (10 times or more).

X-ray crystallographic measurements of the single crystals were carried out on Bruker APEX-II CCD diffractometer (Bruker Daltonic Inc.) using monochromated Ga  $K\alpha$  radiation ( $\lambda = 0.71073\text{ \AA}$ ) at room temperature. Cell parameters were retrieved using SMART software and refined using SAINT<sup>1</sup> program in order to reduce the highly redundant data sets. Data were collected using a narrow-frame method with scan width of  $0.30^\circ$  in  $\omega$  and an exposure time of  $5\text{ s}$  per frame. Absorption corrections were applied using SADABS<sup>2</sup> supplied by Bruker. The structures were solved by direct methods and refined by full-matrix least-squares on  $F^2$  using the program SHELXS-2014. The positions of metal atoms and their first coordination spheres were located from direct-Emaps, other non-hydrogen atoms were found in alternating difference Fourier syntheses and least-squares refinement cycles and during the final cycles refined anisotropically. Hydrogen atoms were placed in calculated position and refined as riding atoms with a uniform value of  $U_{\text{iso}}$ .

## S2. Experiment section

The  $[(\text{dfppy})_2\text{Ir}(\mu\text{-Cl})_2]$  chloride-bridged dimer was prepared according to the reported method.

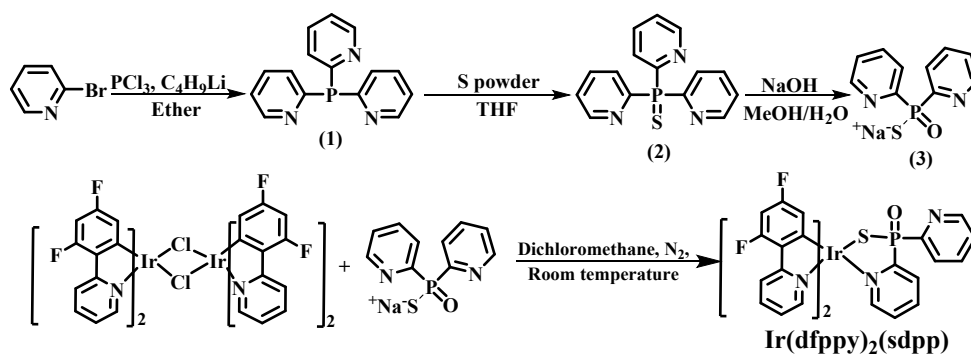

**Scheme S1.** Synthesis of the ancillary ligand and Ir(dfppy)<sub>2</sub>(sdpp).

## 2.1 Synthetic Procedures

### 2.1.1 Tri(2-pyridine)phosphine (1)

A solution of 2.5 N *n*-butyllithium (6.40 mL, 16.00 mmol) in 15 mL of Et<sub>2</sub>O was cooled to -78 °C, and 2-bromopyridine (2.52 g, 15.94 mmol) in Et<sub>2</sub>O (6 mL) at -78 °C was added, and the dark red solution was stirred for 4 h at this temperature. A solution of phosphorus trichloride (0.74 g, 5.40 mmol) in Et<sub>2</sub>O (10 mL) was added dropwise during 1 h at -78 °C and the solution was stirred at -78 °C for 2 h before warming slowly to room temperature. The tan-colored mixture was stopped with H<sub>2</sub>SO<sub>4</sub> (20 mL, 2N) and the solution made alkaline with saturated NaOH solution to precipitate solid. The solid product was collected and recrystallized from acetone-petroleum (1:1, v/v) to get 0.59 g pure product with 41.09% yields.

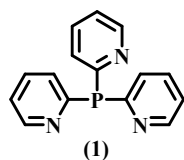

<sup>1</sup>H NMR (400 MHz, CDCl<sub>3</sub>) δ 8.65 (dt, *J* = 4.8, 1.4 Hz, 3H), 7.55 (tt, *J* = 7.7, 2.0 Hz, 3H), 7.34 (ddt, *J* = 7.8, 2.1, 1.1 Hz, 3H), 7.15 (ddt, *J* = 7.5, 4.8, 1.2 Hz, 3H). <sup>31</sup>P NMR (162 MHz, CDCl<sub>3</sub>) δ -0.79 (s).

### 2.2.2 Sulfide-dipyridinylphosphinate (sdpp) (2)

The *tri*(2-pyridine)phosphine (0.59 g, 2.22 mmol) was then dissolved in tetrahydrofuran (30 mL) with S<sub>8</sub> (0.64 g, 2.5 mmol) and refluxed overnight under argon, giving the crude product sulfide-dipyridinylphosphinate. Then, the solvent was removed and the crude product was purified by column chromatography with CH<sub>2</sub>Cl<sub>2</sub>: petroleum ether = 2:1 as eluent with a yield of 75% (0.49 g).

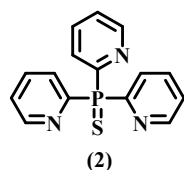

$^1\text{H}$  NMR (400 MHz,  $\text{CDCl}_3$ )  $\delta$  8.80-8.74 (m, 3H), 8.31 (ddt,  $J = 7.8, 6.6, 1.1$  Hz, 3H), 7.83 (tdd,  $J = 7.7, 4.5, 1.8$  Hz, 3H), 7.38 (dddd,  $J = 7.7, 4.5, 2.9, 1.2$  Hz, 3H).  $^{31}\text{P}$  NMR (162 MHz,  $\text{CDCl}_3$ )  $\delta$  34.06 (s).

### 2.2.3 Sodium dipyridinylphosphorothioate (sdppNa) (3)

sdpp (0.49 g, 1.84 mmol) was dissolved in methanol (5 mL)/ $\text{H}_2\text{O}$  (5 mL), and the mixture was stirred at room temperature for 30 minutes. Sodium hydroxide (0.22 g, 5.55 mmol) aqueous solution was added, and the mixture was stirred at room temperature for 24 h. Then, the solvent was removed, and the residue was extracted with MeOH (15 mL), concentrated and dried to give the sodium dipyridinylphosphorothioate (0.72 g) with about 80% yields without further purification.

### 2.2.4 $\text{Ir}(\text{dfppy})_2(\text{sdpp})$

$[(\text{dfppy})_2\text{Ir}(\mu\text{-Cl})_2]$  (1.15 g, 0.95 mmol) and 2.5 equivalent sdppNa (0.6 g, 2.37 mmol) were dissolved in 10 mL of dichloromethane. After degassed, the reaction was stirred at room temperature for about 10 min under argon. Then the solvent was removed and the crude compound was purified by column chromatography with  $\text{CHCl}_3:\text{MeOH} = 20:1$  as eluent. Further purification was taken by gradient sublimation with a yield of 30.1% (0.45 g). Then, four chiral Ir(III) isomers were obtained by separation on the optical resolution of chiral high performance liquid chromatography (HPLC). The final products were fully characterized by  $^1\text{H}$  NMR,  $^{13}\text{C}$  NMR, high-resolution mass spectroscopy (HRMS) and single-crystal structure analyses.

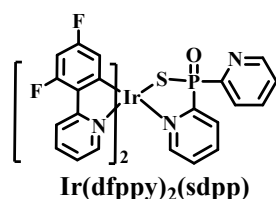

$^1\text{H}$  NMR (400 MHz,  $\text{CDCl}_3$ )  $\delta$  9.92 (s, 1H),  $\delta$  8.21 (d,  $J = 8.3$  Hz, 2H), 7.82-7.76 (m, 2H), 7.72-7.64 (m, 4H), 6.94 (ddd,  $J = 7.4, 5.9, 1.4$  Hz, 2H), 6.69 (dd,  $J = 1.9, 0.6$  Hz, 2H), 6.43 (ddd,  $J = 12.6, 9.2, 2.4$  Hz, 3H), 6.14 (t,  $J = 2.0$  Hz, 2H), 5.73 (dd,  $J = 8.6, 2.4$  Hz, 2H).  $^{19}\text{F}$  NMR (376 MHz,  $\text{CDCl}_3$ )  $\delta$  -106.59 (1F), -108.49 (1F), -109.02 (1F), -110.64 (1F).  $^{31}\text{P}$  NMR (162 MHz, Chloroform-d)  $\delta$  60.40, 61.05. HR ESI-MS (M/Z): Calcd for  $\text{C}_{32}\text{H}_{20}\text{F}_4\text{IrN}_4\text{OPS}$   $[\text{M}+\text{H}]^+$ : 809.0734, Found 809.0732.

### $\lambda$ - $\text{Ir}(\text{dfppy})_2(\text{S-sdpp})$

$^1\text{H}$  NMR (400 MHz,  $\text{CDCl}_3$ )  $\delta$  8.74 (s, 1H), 8.47 (s, 1H), 8.27 (s, 1H), 8.21-8.14 (m, 1H), 8.07 (s, 1H), 7.97 (ddt,  $J = 7.5, 6.3, 1.2$  Hz, 1H), 7.85 (s, 3H), 7.52 (s, 3H), 7.36 (s, 1H), 7.22 (d,  $J = 26.2$  Hz, 2H), 6.55 (s, 2H), 6.35 (s, 1H), 5.56 (s, 2H).  $^{19}\text{F}$  NMR (376 MHz,

Chloroform-*d*)  $\delta$  -106.56 (1F), -107.69 (1F), -108.82 (1F), -110.58 (1F).  $^{31}\text{P}$  NMR (162 MHz, Chloroform-*d*)  $\delta$  61.18.

$\delta$ -Ir(dfppy) $_2$ (*R*-sdpp)

$^1\text{H}$  NMR (400 MHz,  $\text{CDCl}_3$ )  $\delta$  8.48 (s, 1H), 8.20 (s, 3H), 7.86 (s, 1H), 7.74 (d,  $J = 38.3$  Hz, 4H), 7.44 (s, 1H), 7.28 (s, 2H), 7.13–6.97 (m, 4H), 6.46 (s, 1H), 6.26 (s, 1H), 5.71 (s, 1H), 5.41 (s, 1H).  $^{19}\text{F}$  NMR (376 MHz, Chloroform-*d*)  $\delta$  -106.41(1F), -107.67 (1F), -108.98 (1F), -110.58 (1F).  $^{31}\text{P}$  NMR (162 MHz, Chloroform-*d*)  $\delta$  61.24.

$\lambda$ -Ir(dfppy) $_2$ (*R*-sdpp)

$^1\text{H}$  NMR (400 MHz,  $\text{CDCl}_3$ )  $\delta$  8.38 (s, 1H), 8.14 (d,  $J = 38.4$  Hz, 2H), 7.98 (s, 1H), 7.89 (s, 1H), 7.73 (d,  $J = 31.1$  Hz, 3H), 7.44 (s, 3H), 7.28 (s, 1H), 7.05 (d,  $J = 43.4$  Hz, 3H), 6.45 (s, 2H), 6.27 (s, 1H), 5.49 (s, 2H).  $^{19}\text{F}$  NMR (376 MHz, Chloroform-*d*)  $\delta$  -106.55 (1F), -107.68 (1F), -108.79 (1F), -110.58 (1F).  $^{31}\text{P}$  NMR (162 MHz, Chloroform-*d*)  $\delta$  62.11.

$\delta$ -Ir(dfppy) $_2$ (*S*-sdpp)

$^1\text{H}$  NMR (400 MHz,  $\text{CDCl}_3$ )  $\delta$  8.59 (s, 1H), 8.32 (d,  $J = 20.6$  Hz, 2H), 7.97 (s, 1H), 7.89 (s, 2H), 7.80 (s, 2H), 7.55 (s, 2H), 7.38 (s, 1H), 7.12 (s, 3H), 6.55 (s, 1H), 6.35 (s, 1H), 5.79 (s, 1H), 5.62 (s, 1H), 5.52 (s, 1H), 4.97 (s, 1H).  $^{19}\text{F}$  NMR (376 MHz, Chloroform-*d*)  $\delta$  -106.59 (1F), -108.52 (1F), -109.05 (1F), -110.64 (1F).  $^{31}\text{P}$  NMR (162 MHz, Chloroform-*d*)  $\delta$ , 62.29.

## 2.2 NMR and HMMS spectra

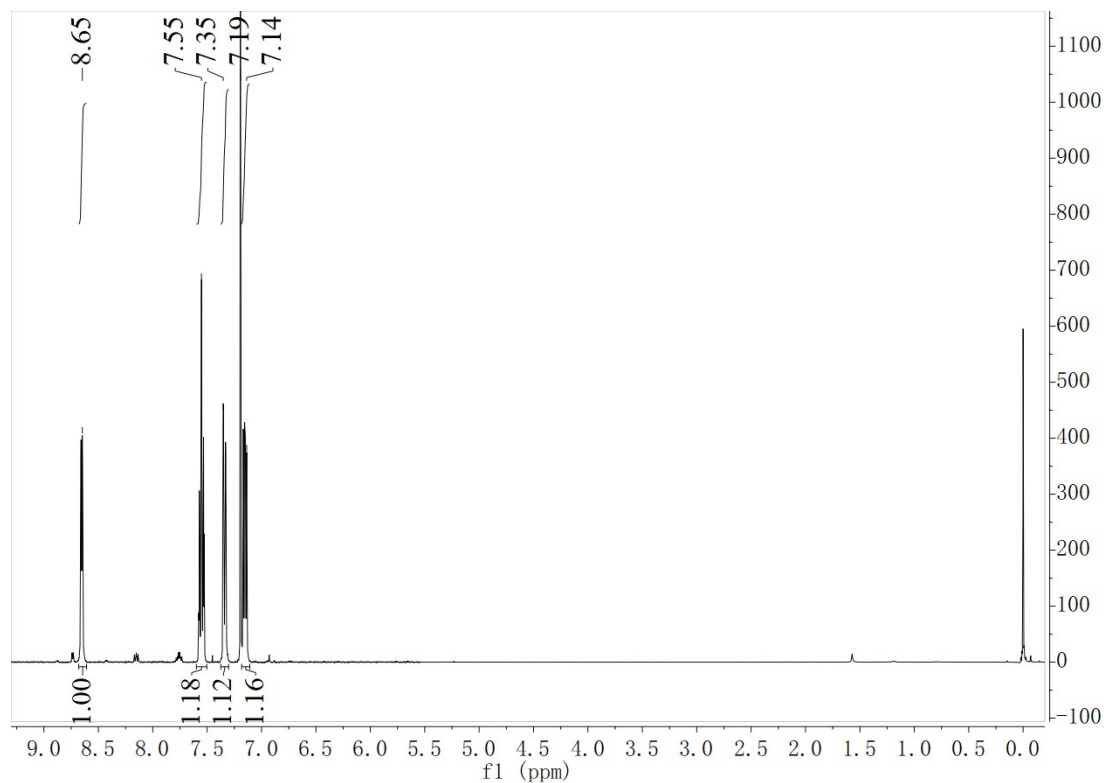

**Fig. S1** The  $^1\text{H}$  NMR spectrum of tri(2-pyridine)phosphine.

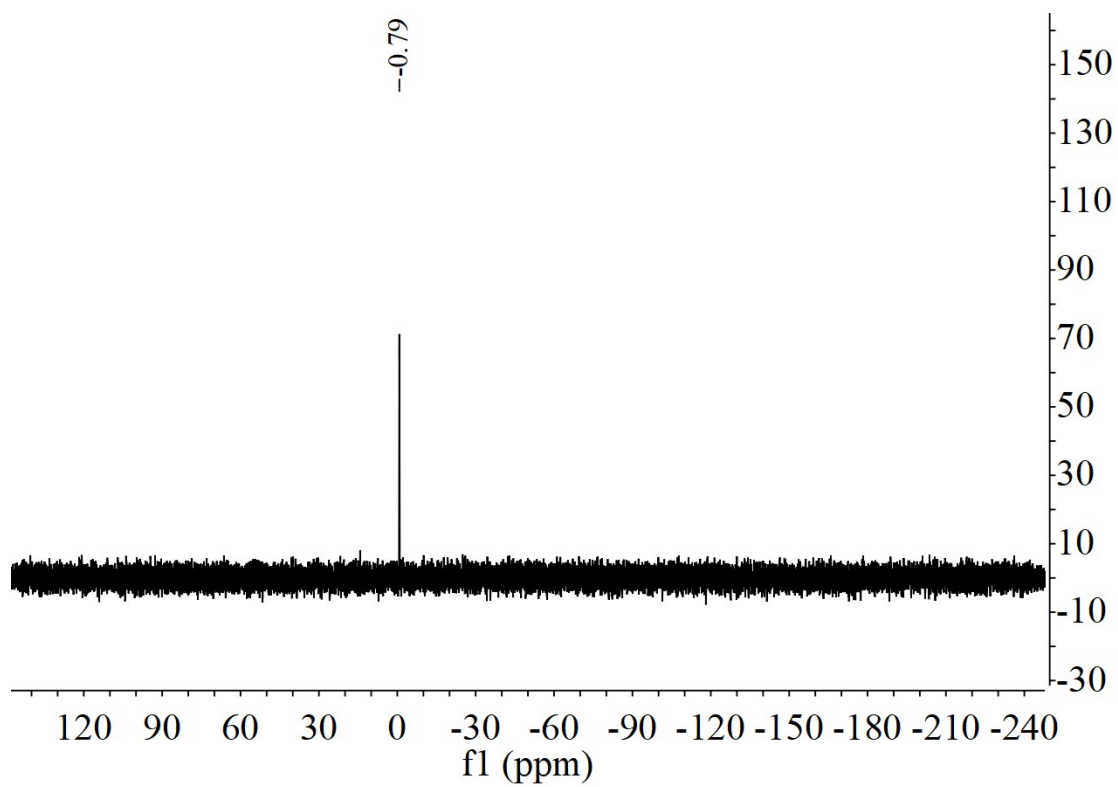

**Fig. S2** The  $^{31}\text{P}$  NMR spectrum of tri(2-pyridine)phosphine.

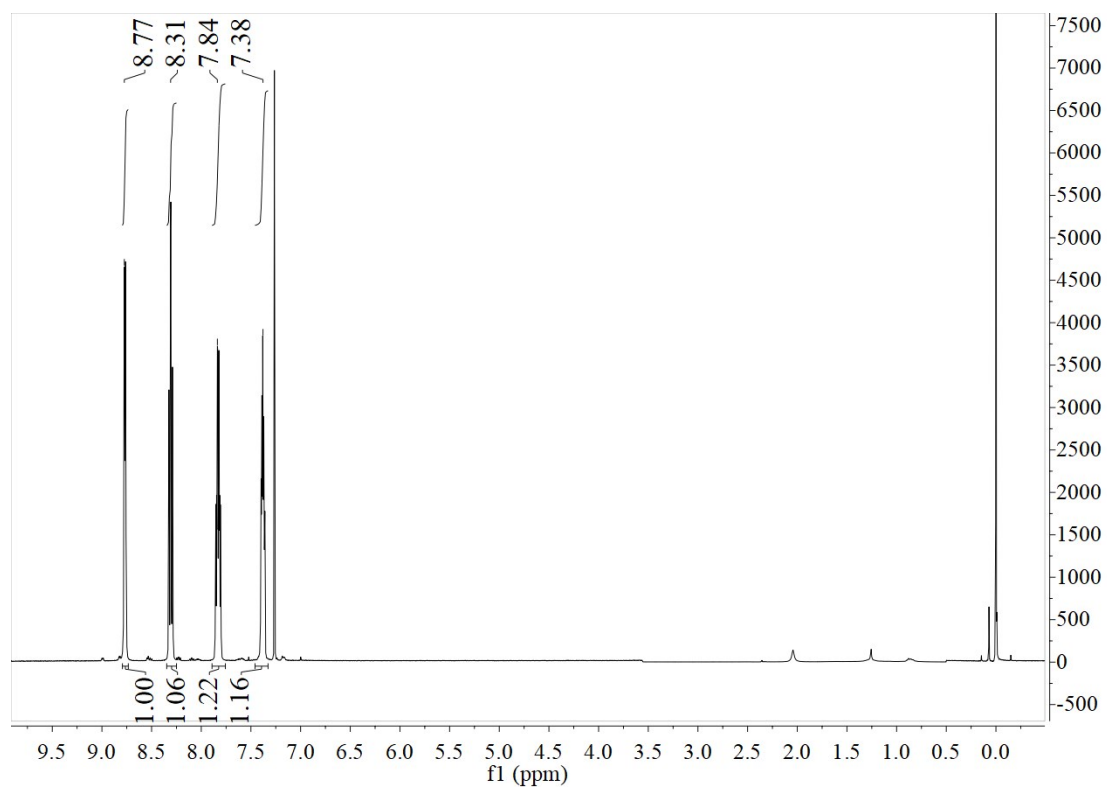

**Fig. S3** The  $^1\text{H}$  NMR spectrum of tri(pyridin-2-yl)phosphine sulfide.

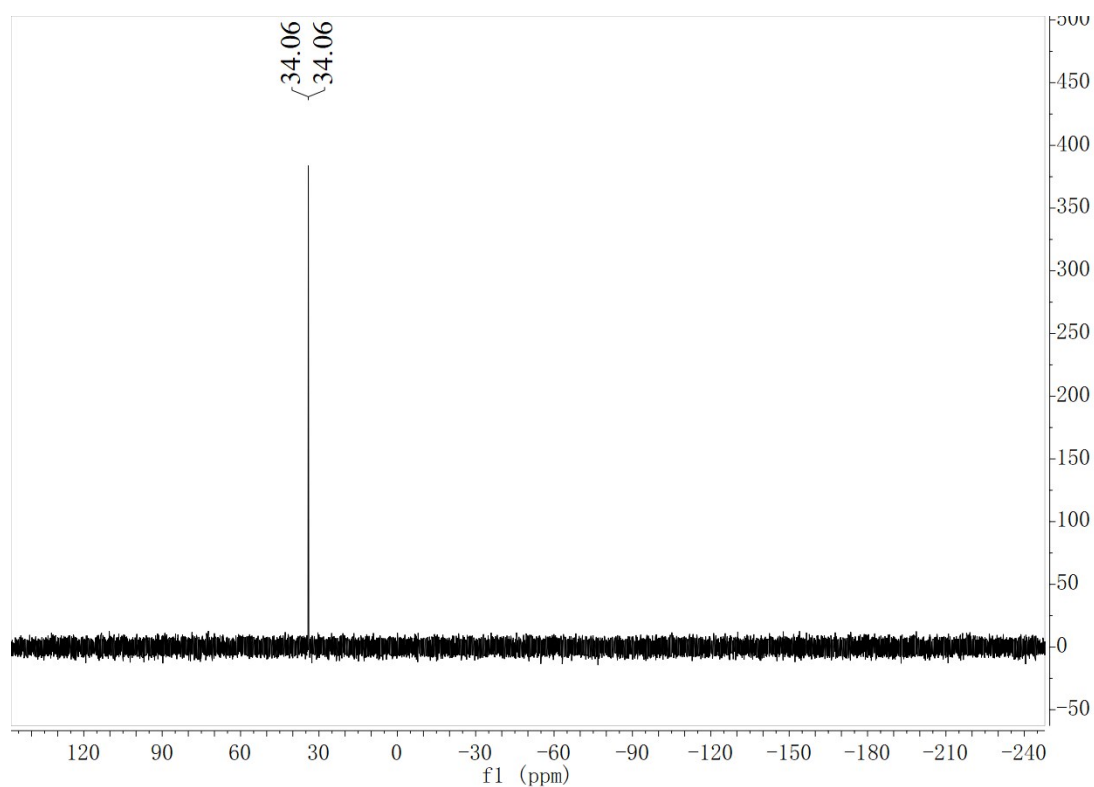

**Fig. S4** The  $^{31}\text{P}$  NMR spectrum of tri(pyridin-2-yl)phosphine sulfide.

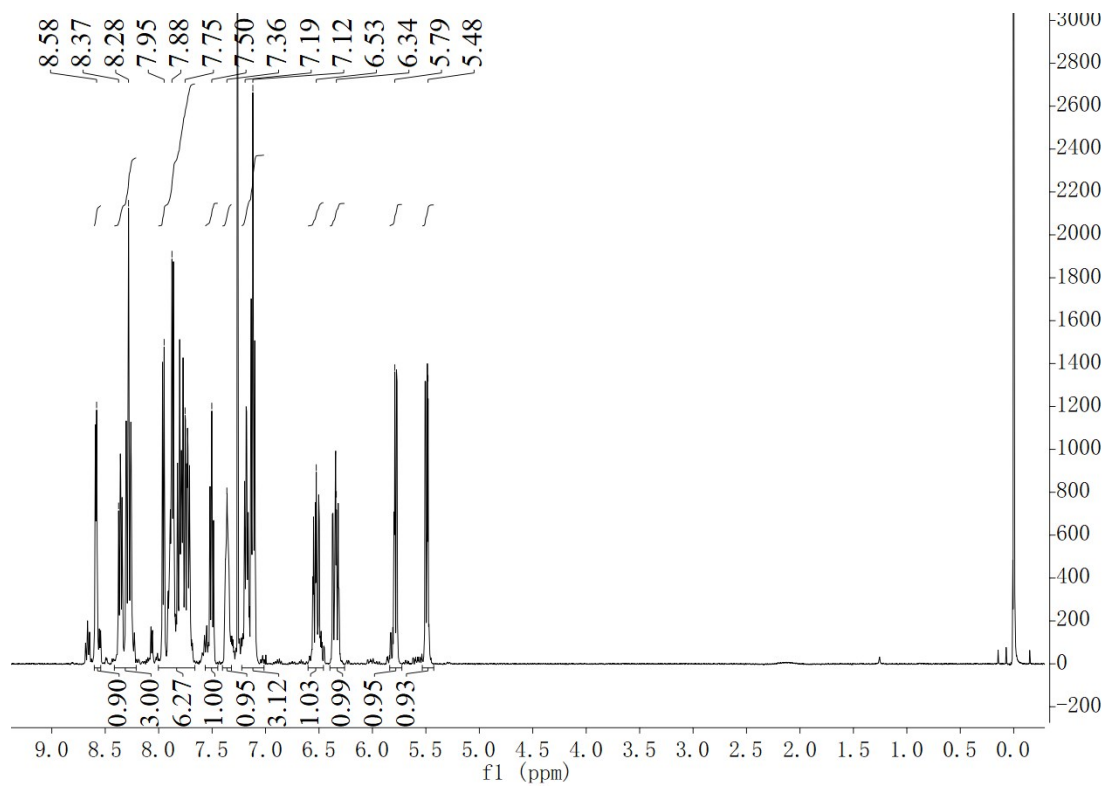

**Fig. S5** The  $^1\text{H}$  NMR spectrum of  $\text{Ir}(\text{dfppy})_2(\text{sdpp})$ .

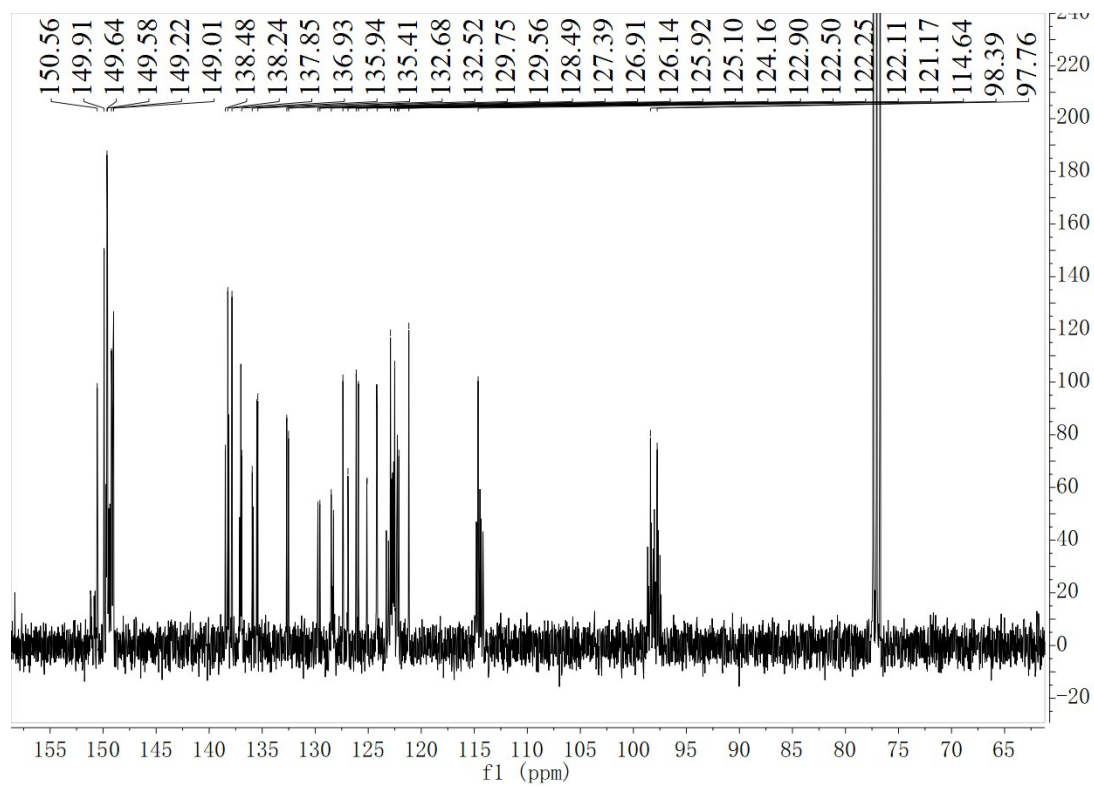

**Fig. S6** The  $^{13}\text{C}$  NMR spectrum of  $\text{Ir}(\text{dfppy})_2(\text{sdpp})$ .

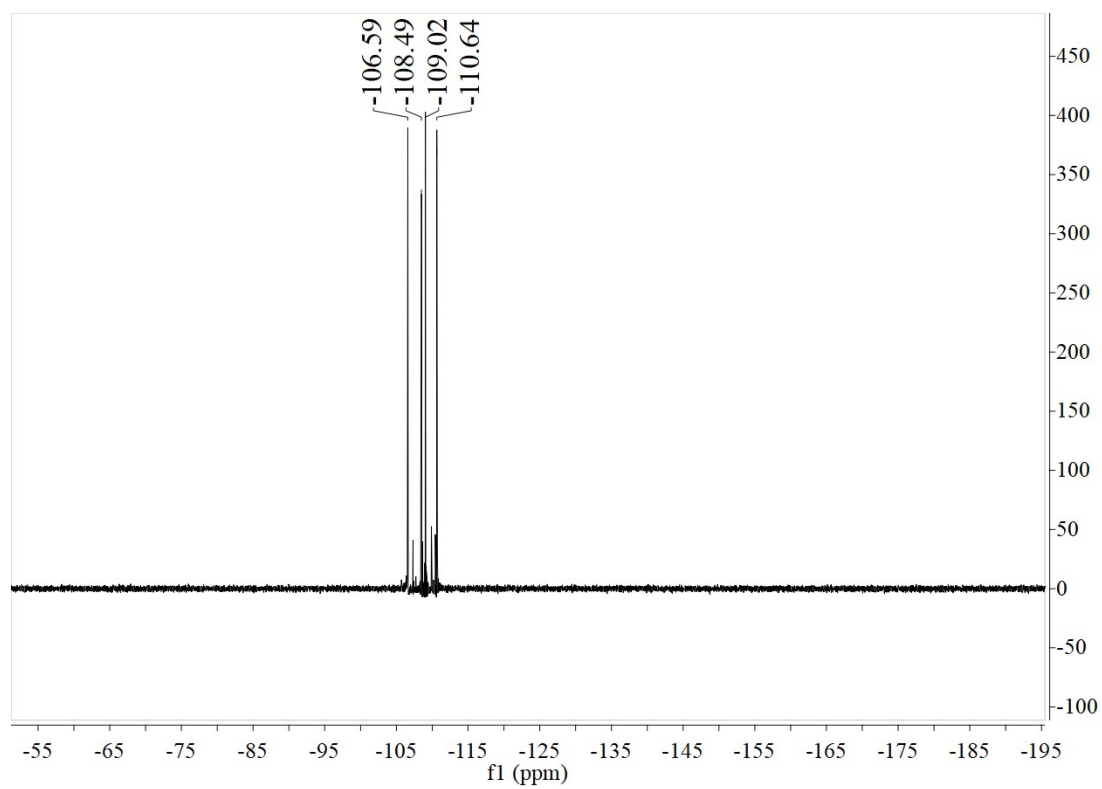

**Fig. S7** The  $^{13}\text{F}$  NMR spectrum of  $\text{Ir}(\text{dfppy})_2(\text{sdpp})$ .



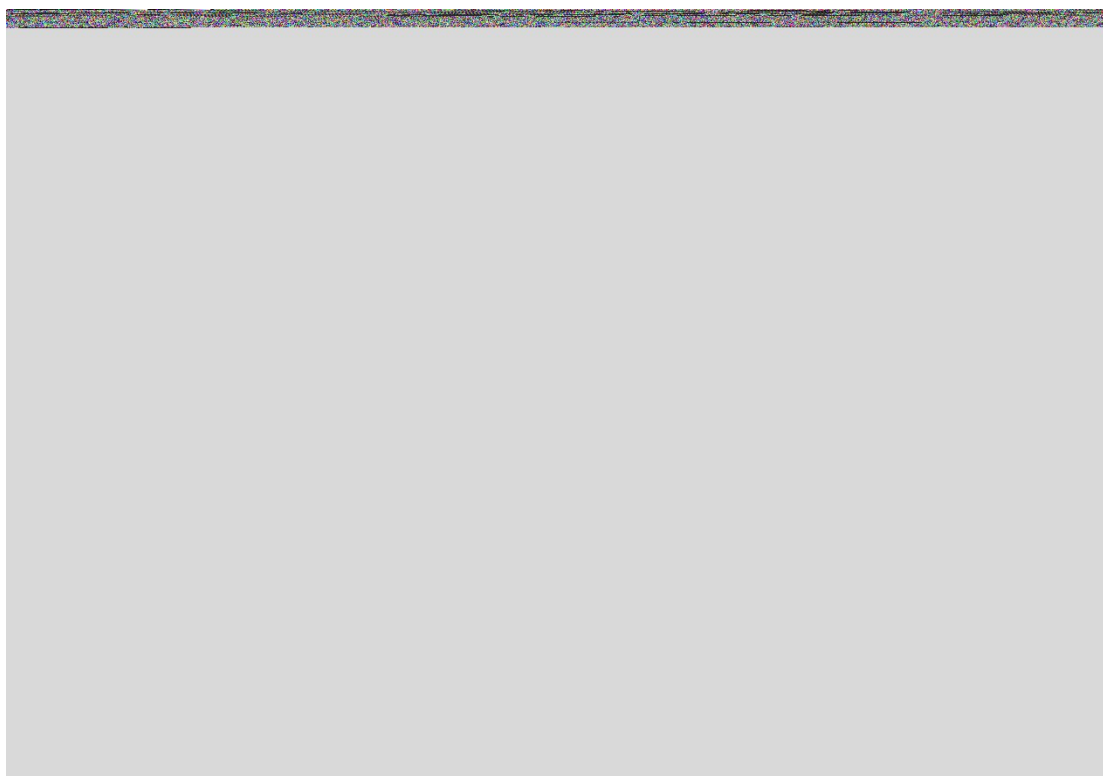

Fig. S8 The  $^{13}\text{P}$  NMR spectrum of  $\text{Ir}(\text{dfppy})_2(\text{sdpp})$ .

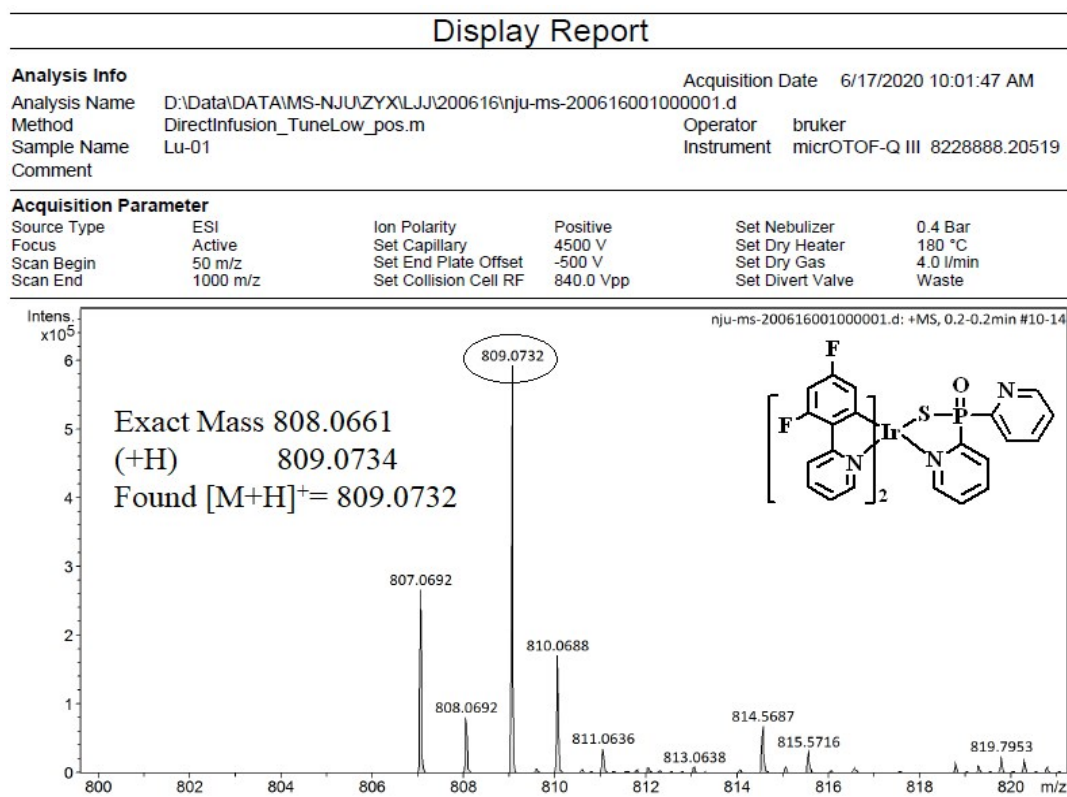

Fig. S9 The high-resolution MS spectrum of  $\text{Ir}(\text{dfppy})_2(\text{sdpp})$ .

## 2.4 X-ray crystallographic data

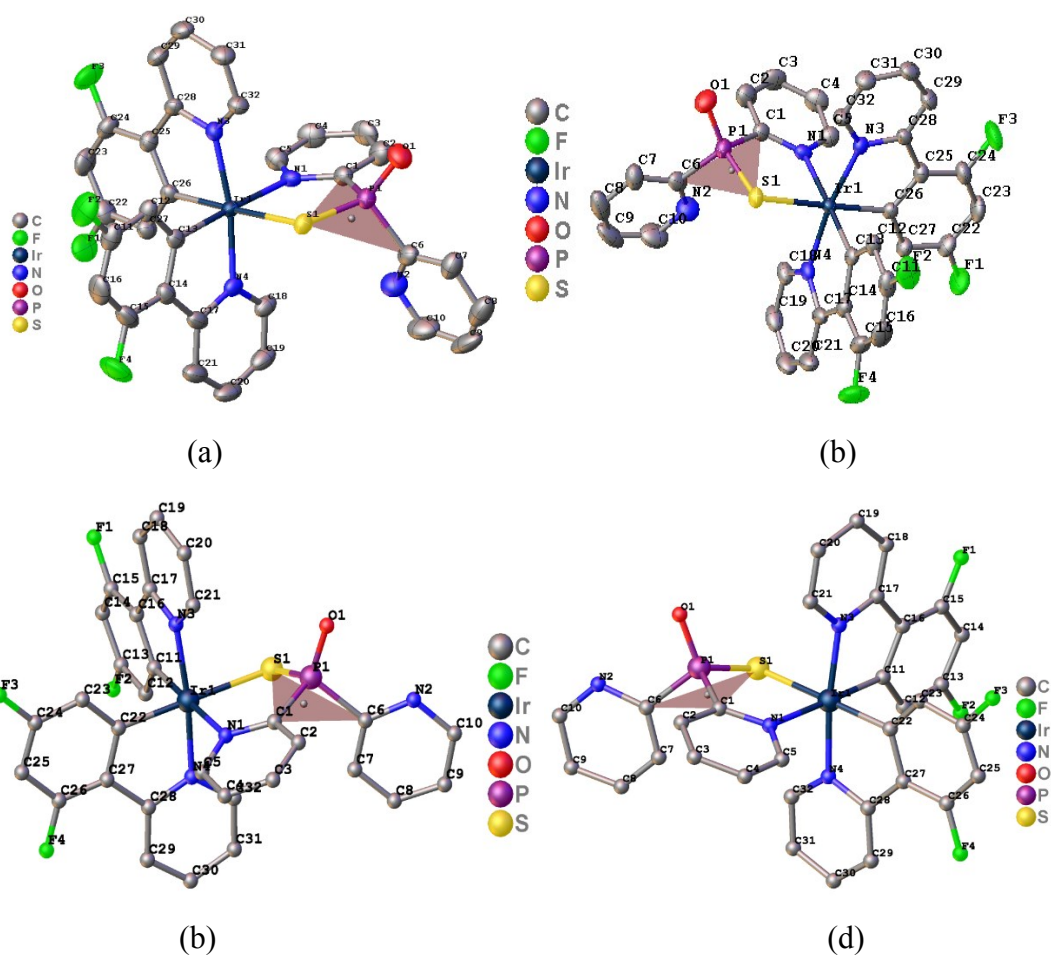

**Fig. S10** Crystal structures of (a)  $\lambda$ -Ir(dfppy)<sub>2</sub>(S-sdpp), (b)  $\delta$ -Ir(dfppy)<sub>2</sub>(R-sdpp), (c)  $\lambda$ -Ir(dfppy)<sub>2</sub>(R-sdpp) and (d)  $\delta$ -Ir(dfppy)<sub>2</sub>(S-sdpp).

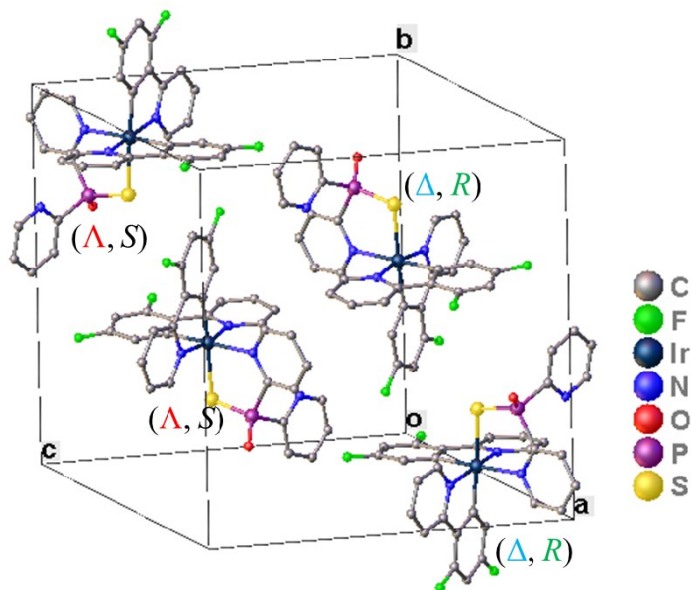

**Fig. S11** Crystal structures of the enantiomers of  $\lambda$ -Ir(dfppy)<sub>2</sub>(S-sdpp) and  $\delta$ -Ir(dfppy)<sub>2</sub>(R-sdpp) (CCDC: 2031307).

**Table S1.** Crystal data and structure refinement for the enantiomers of  $\lambda$ -Ir(dfppy)<sub>2</sub>(S-sdpp) and  $\delta$ -Ir(dfppy)<sub>2</sub>(R-sdpp).

|                                             |                                                                     |
|---------------------------------------------|---------------------------------------------------------------------|
| Identification code                         | 2031307                                                             |
| Empirical formula                           | C <sub>32</sub> H <sub>20</sub> F <sub>4</sub> IrN <sub>4</sub> OPS |
| Formula weight                              | 807.75                                                              |
| Temperature/K                               | 296(2)                                                              |
| Crystal system                              | monoclinic                                                          |
| Space group                                 | P2 <sub>1</sub> /n                                                  |
| a/Å                                         | 12.887(3)                                                           |
| b/Å                                         | 16.441(3)                                                           |
| c/Å                                         | 15.163(3)                                                           |
| $\alpha$ /°                                 | 90                                                                  |
| $\beta$ /°                                  | 111.68(3)                                                           |
| $\gamma$ /°                                 | 90                                                                  |
| Volume/Å <sup>3</sup>                       | 2985.2(12)                                                          |
| Z                                           | 4                                                                   |
| $\rho_{\text{calc}}$ /cm <sup>3</sup>       | 1.797                                                               |
| $\mu$ /mm <sup>-1</sup>                     | 7.096                                                               |
| F(000)                                      | 1568.0                                                              |
| Crystal size/mm <sup>3</sup>                | 0.15 × 0.12 × 0.09                                                  |
| Radiation                                   | GaK $\alpha$ ( $\lambda$ = 1.34139)                                 |
| 2 $\Theta$ range for data collection/°      | 7.188 to 108.01                                                     |
| Index ranges                                | -14 ≤ h ≤ 15, -19 ≤ k ≤ 18, -14 ≤ l ≤ 18                            |
| Reflections collected                       | 18054                                                               |
| Independent reflections                     | 5435 [R <sub>int</sub> = 0.0323, R <sub>sigma</sub> = 0.0313]       |
| Data/restraints/parameters                  | 5435/0/397                                                          |
| Goodness-of-fit on F <sup>2</sup>           | 1.114                                                               |
| Final R indexes [I ≥ 2 $\sigma$ (I)]        | R <sub>1</sub> = 0.0276, wR <sub>2</sub> = 0.0689                   |
| Final R indexes [all data]                  | R <sub>1</sub> = 0.0300, wR <sub>2</sub> = 0.0701                   |
| Largest diff. peak/hole / e Å <sup>-3</sup> | 1.02/-0.79                                                          |

**Table S2.** Bond Lengths for the enantiomers of  $\lambda$ -Ir(dfppy)<sub>2</sub>(S-sdpp) and  $\delta$ -Ir(dfppy)<sub>2</sub>(R-sdpp).

| Atom | Atom | Length/Å   | Atom | Atom | Length/Å |
|------|------|------------|------|------|----------|
| Ir   | S1   | 2.4714(11) | C5   | C20  | 1.387(6) |
| Ir   | N1   | 2.203(3)   | C6   | C8   | 1.467(5) |
| Ir   | N2   | 2.040(3)   | C6   | C23  | 1.384(5) |
| Ir   | N3   | 2.054(3)   | C7   | C24  | 1.376(6) |
| Ir   | C1   | 2.009(4)   | C8   | C21  | 1.388(5) |
| Ir   | C2   | 2.001(4)   | C9   | C26  | 1.377(6) |
| S1   | P003 | 1.9963(15) | C10  | C13  | 1.370(7) |
| P003 | O1   | 1.496(3)   | C10  | C14  | 1.368(8) |
| P003 | C7   | 1.831(4)   | N4   | C15  | 1.313(6) |
| P003 | C15  | 1.815(4)   | N4   | C31  | 1.345(6) |
| N1   | C7   | 1.358(5)   | C11  | C22  | 1.372(5) |

|      |      |          |     |     |          |
|------|------|----------|-----|-----|----------|
| N1   | C9   | 1.324(5) | C12 | C28 | 1.382(6) |
| N2   | C5   | 1.378(6) | C13 | F4  | 1.365(6) |
| N2   | C12  | 1.342(5) | C15 | C25 | 1.390(7) |
| N3   | C8   | 1.360(5) | C16 | C17 | 1.370(6) |
| N3   | C16  | 1.348(5) | C17 | C18 | 1.378(7) |
| F1   | C22  | 1.357(5) | C18 | C21 | 1.383(6) |
| F2   | C14  | 1.360(5) | C19 | C22 | 1.367(7) |
| C1   | C0AA | 1.406(6) | C19 | C23 | 1.382(6) |
| C1   | C4   | 1.397(6) | C20 | C29 | 1.373(7) |
| F3   | C23  | 1.369(5) | C24 | C27 | 1.383(7) |
| C2   | C6   | 1.414(5) | C25 | C30 | 1.390(7) |
| C2   | C11  | 1.398(5) | C26 | C27 | 1.376(7) |
| C0AA | C5   | 1.451(6) | C28 | C29 | 1.367(8) |
| C0AA | C13  | 1.388(6) | C30 | C32 | 1.369(9) |
| C4   | C14  | 1.365(6) | C31 | C32 | 1.377(9) |

**Table S3.** Bond Angles for the enantiomers of  $\lambda$ -Ir(dfppy)<sub>2</sub>(S-sdpp) and  $\delta$ -Ir(dfppy)<sub>2</sub>(R-sdpp).

| Atom  | Atom  | Atom  | Angle/p    | Atom  | Atom  | Atom  | Angle/p  |
|-------|-------|-------|------------|-------|-------|-------|----------|
| N(1)  | Ir(1) | S(1)  | 87.20(8)   | C(26) | C(25) | C(28) | 115.1(3) |
| N(4)  | Ir(1) | S(1)  | 89.82(8)   | C(24) | C(25) | C(26) | 118.4(4) |
| N(4)  | Ir(1) | N(1)  | 97.79(13)  | C(24) | C(25) | C(28) | 126.5(4) |
| N(4)  | Ir(1) | N(3)  | 170.77(12) | N(1)  | C(1)  | P(1)  | 121.2(3) |
| N(3)  | Ir(1) | S(1)  | 97.38(9)   | N(1)  | C(1)  | C(2)  | 121.6(4) |
| N(3)  | Ir(1) | N(1)  | 88.37(12)  | C(2)  | C(1)  | P(1)  | 117.0(3) |
| C(13) | Ir(1) | S(1)  | 92.24(10)  | N(3)  | C(28) | C(25) | 113.4(3) |
| C(13) | Ir(1) | N(1)  | 177.97(13) | N(3)  | C(28) | C(29) | 120.2(4) |
| C(13) | Ir(1) | N(4)  | 80.26(15)  | C(29) | C(28) | C(25) | 126.4(4) |
| C(13) | Ir(1) | N(3)  | 93.64(14)  | N(1)  | C(5)  | C(4)  | 123.3(4) |
| C(26) | Ir(1) | S(1)  | 176.98(10) | C(11) | C(16) | C(15) | 116.8(4) |
| C(26) | Ir(1) | N(1)  | 94.26(13)  | C(6)  | N(2)  | C(10) | 116.9(5) |
| C(26) | Ir(1) | N(4)  | 92.60(13)  | C(22) | C(27) | C(26) | 120.0(4) |
| C(26) | Ir(1) | N(3)  | 80.04(13)  | N(4)  | C(18) | C(19) | 122.1(5) |
| C(26) | Ir(1) | C(13) | 86.39(14)  | C(16) | C(15) | C(14) | 123.6(5) |
| P(1)  | S(1)  | Ir(1) | 101.94(5)  | F(4)  | C(15) | C(14) | 119.8(5) |
| O(1)  | P(1)  | S(1)  | 117.50(14) | F(4)  | C(15) | C(16) | 116.5(4) |
| O(1)  | P(1)  | C(1)  | 109.7(2)   | F(2)  | C(11) | C(12) | 118.7(5) |
| O(1)  | P(1)  | C(6)  | 108.7(2)   | F(2)  | C(11) | C(16) | 118.0(4) |
| C(1)  | P(1)  | S(1)  | 107.75(13) | C(12) | C(11) | C(16) | 123.3(5) |
| C(6)  | P(1)  | S(1)  | 108.79(15) | N(2)  | C(6)  | P(1)  | 117.0(3) |
| C(6)  | P(1)  | C(1)  | 103.48(19) | N(2)  | C(6)  | C(7)  | 124.1(4) |
| C(1)  | N(1)  | Ir(1) | 121.9(3)   | C(7)  | C(6)  | P(1)  | 118.8(3) |
| C(5)  | N(1)  | Ir(1) | 120.1(3)   | N(3)  | C(32) | C(31) | 122.6(4) |
| C(5)  | N(1)  | C(1)  | 117.9(4)   | C(32) | C(31) | C(30) | 118.9(4) |
| C(17) | N(4)  | Ir(1) | 116.2(3)   | C(31) | C(30) | C(29) | 119.1(4) |
| C(18) | N(4)  | Ir(1) | 124.1(3)   | C(22) | C(23) | C(24) | 116.3(4) |

|       |       |       |          |       |       |       |          |
|-------|-------|-------|----------|-------|-------|-------|----------|
| C(18) | N(4)  | C(17) | 119.6(4) | C(20) | C(21) | C(17) | 120.0(5) |
| C(28) | N(3)  | Ir(1) | 116.4(2) | C(30) | C(29) | C(28) | 120.1(4) |
| C(32) | N(3)  | Ir(1) | 124.3(3) | F(1)  | C(22) | C(27) | 118.3(4) |
| C(32) | N(3)  | C(28) | 119.1(3) | F(1)  | C(22) | C(23) | 118.3(4) |
| C(14) | C(13) | Ir(1) | 114.2(3) | C(23) | C(22) | C(27) | 123.3(4) |
| C(12) | C(13) | Ir(1) | 126.1(3) | F(3)  | C(24) | C(25) | 120.3(4) |
| C(12) | C(13) | C(14) | 119.7(4) | F(3)  | C(24) | C(23) | 116.0(4) |
| C(25) | C(26) | Ir(1) | 115.0(3) | C(23) | C(24) | C(25) | 123.7(4) |
| C(27) | C(26) | Ir(1) | 126.7(3) | C(1)  | C(2)  | C(3)  | 119.9(4) |
| C(27) | C(26) | C(25) | 118.3(4) | C(8)  | C(7)  | C(6)  | 117.9(5) |
| C(13) | C(14) | C(17) | 116.3(4) | C(3)  | C(4)  | C(5)  | 119.2(4) |
| C(15) | C(14) | C(13) | 117.4(4) | C(4)  | C(3)  | C(2)  | 118.0(4) |
| C(15) | C(14) | C(17) | 126.3(4) | C(20) | C(19) | C(18) | 118.6(5) |
| C(11) | C(12) | C(13) | 119.1(4) | C(19) | C(20) | C(21) | 120.3(4) |
| N(4)  | C(17) | C(14) | 112.9(3) | C(9)  | C(8)  | C(7)  | 118.7(5) |
| N(4)  | C(17) | C(21) | 119.4(4) | N(2)  | C(10) | C(9)  | 123.4(5) |
| C(21) | C(17) | C(14) | 127.7(4) | C(8)  | C(9)  | C(10) | 118.9(5) |

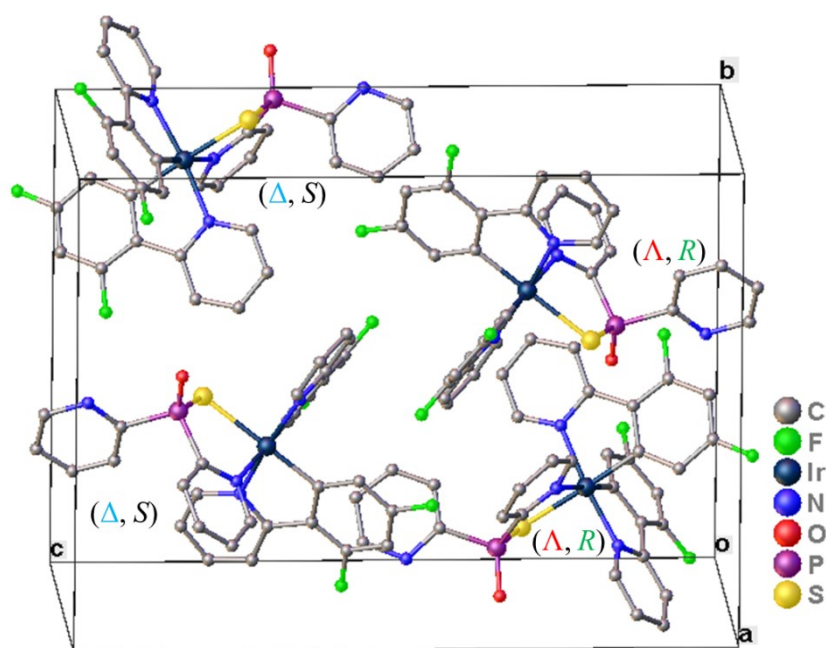

**Fig. S12** Crystal structures of the enantiomers of  $\delta$ -Ir(dfppy)<sub>2</sub>(S-sdpp) and  $\lambda$ -Ir(dfppy)<sub>2</sub>(R-sdpp) (CCDC: 1956514).

**Table S4.** Crystal data and structure refinement for the enantiomers of  $\delta$ -Ir(dfppy)<sub>2</sub>(S-sdpp) and  $\lambda$ -Ir(dfppy)<sub>2</sub>(R-sdpp).

|                     |                                                                     |
|---------------------|---------------------------------------------------------------------|
| Identification code | 1956514                                                             |
| Empirical formula   | C <sub>32</sub> H <sub>21</sub> F <sub>4</sub> IrN <sub>4</sub> OPS |
| Formula weight      | 808.76                                                              |
| Temperature/K       | 296.15                                                              |

|                                             |                                                                       |
|---------------------------------------------|-----------------------------------------------------------------------|
| Crystal system                              | monoclinic                                                            |
| Space group                                 | P2 <sub>1</sub> /n                                                    |
| a/Å                                         | 9.1844(3)                                                             |
| b/Å                                         | 15.1203(4)                                                            |
| c/Å                                         | 20.3141(5)                                                            |
| $\alpha$ /°                                 | 90.00                                                                 |
| $\beta$ /°                                  | 91.0290(10)                                                           |
| $\gamma$ /°                                 | 90.00                                                                 |
| Volume/Å <sup>3</sup>                       | 2820.58(14)                                                           |
| Z                                           | 4                                                                     |
| $\rho_{\text{calc}}$ /cm <sup>3</sup>       | 1.905                                                                 |
| $\mu$ /mm <sup>-1</sup>                     | 4.927                                                                 |
| F(000)                                      | 1572.0                                                                |
| Radiation                                   | MoK $\alpha$ ( $\lambda$ = 1.54780)                                   |
| 2 $\Theta$ range for data collection/°      | 7.32 to 137.62                                                        |
| Index ranges                                | -9 $\leq$ h $\leq$ 11, -18 $\leq$ k $\leq$ 12, -20 $\leq$ l $\leq$ 24 |
| Reflections collected                       | 12831                                                                 |
| Independent reflections                     | 5004 [R <sub>int</sub> = 0.0358, R <sub>sigma</sub> = 0.0353]         |
| Data/restraints/parameters                  | 5004/1/382                                                            |
| Goodness-of-fit on F <sup>2</sup>           | 1.110                                                                 |
| Final R indexes [I >= 2 $\sigma$ (I)]       | R <sub>1</sub> = 0.0341, wR <sub>2</sub> = 0.0821                     |
| Final R indexes [all data]                  | R <sub>1</sub> = 0.0369, wR <sub>2</sub> = 0.0834                     |
| Largest diff. peak/hole / e Å <sup>-3</sup> | 1.20/-1.36                                                            |

**Table S5.** Bond Lengths for the enantiomers of  $\delta$ -Ir(dfppy)<sub>2</sub>(S-sdpp) and  $\lambda$ -Ir(dfppy)<sub>2</sub>(R-sdpp).

| Atom  | Atom  | Length//Å  | Atom  | Atom  | Length//Å |
|-------|-------|------------|-------|-------|-----------|
| Ir(1) | S(1)  | 2.4655(14) | C(16) | C(15) | 1.401(6)  |
| Ir(1) | N(3)  | 2.042(4)   | C(23) | C(24) | 1.379(7)  |
| Ir(1) | N(4)  | 2.038(4)   | C(15) | C(14) | 1.368(7)  |
| Ir(1) | N(1)  | 2.170(4)   | C(12) | C(13) | 1.379(7)  |
| Ir(1) | C(22) | 2.016(5)   | C(21) | C(20) | 1.376(7)  |
| Ir(1) | C(11) | 1.992(5)   | C(19) | C(20) | 1.388(8)  |
| S(1)  | P(1)  | 1.9936(19) | C(19) | C(18) | 1.385(8)  |
| P(1)  | O(1)  | 1.509(4)   | C(24) | C(25) | 1.373(8)  |
| P(1)  | C(1)  | 1.837(6)   | C(27) | C(26) | 1.382(7)  |
| P(1)  | C(6)  | 1.834(6)   | C(27) | C(28) | 1.462(7)  |
| F(1)  | C(15) | 1.358(6)   | C(32) | C(31) | 1.384(7)  |
| F(2)  | C(13) | 1.350(6)   | C(5)  | C(4)  | 1.392(7)  |
| F(3)  | C(24) | 1.361(6)   | C(26) | C(25) | 1.386(8)  |
| F(4)  | C(26) | 1.354(6)   | C(1)  | C(2)  | 1.384(7)  |
| N(3)  | C(17) | 1.379(6)   | C(7)  | C(6)  | 1.343(8)  |
| N(3)  | C(21) | 1.355(6)   | C(7)  | C(8)  | 1.351(9)  |
| N(4)  | C(32) | 1.361(6)   | C(4)  | C(3)  | 1.371(9)  |
| N(4)  | C(28) | 1.368(7)   | C(28) | C(29) | 1.410(7)  |
| N(1)  | C(5)  | 1.350(7)   | C(3)  | C(2)  | 1.403(9)  |

|       |       |          |       |       |           |
|-------|-------|----------|-------|-------|-----------|
| N(1)  | C(1)  | 1.359(7) | C(14) | C(13) | 1.386(7)  |
| C(22) | C(23) | 1.391(7) | C(30) | C(31) | 1.392(9)  |
| C(22) | C(27) | 1.418(7) | C(30) | C(29) | 1.388(9)  |
| C(17) | C(16) | 1.464(6) | C(6)  | N(2)  | 1.384(8)  |
| C(17) | C(18) | 1.390(7) | N(2)  | C(10) | 1.411(10) |
| C(11) | C(16) | 1.413(7) | C(8)  | C(9)  | 1.393(12) |
| C(11) | C(12) | 1.410(7) | C(10) | C(9)  | 1.396(11) |

**Table S6.** Bond Angles for the enantiomers of  $\delta$ -Ir(dfppy)<sub>2</sub>(*S*-sdpp) and  $\lambda$ -Ir(dfppy)<sub>2</sub>(*R*-sdpp).

| Atom  | Atom  | Atom  | Angle/°    | Atom  | Atom  | Atom  | Angle/°  |
|-------|-------|-------|------------|-------|-------|-------|----------|
| N(3)  | Ir(1) | S(1)  | 87.59(11)  | C(16) | C(15) | F(1)  | 120.5(4) |
| N(4)  | Ir(1) | S(1)  | 97.30(12)  | C(14) | C(15) | F(1)  | 115.7(4) |
| N(4)  | Ir(1) | N(3)  | 173.43(15) | C(14) | C(15) | C(16) | 123.8(5) |
| N(1)  | Ir(1) | S(1)  | 88.01(12)  | C(13) | C(12) | C(11) | 118.9(4) |
| N(1)  | Ir(1) | N(3)  | 99.10(15)  | C(20) | C(21) | N(3)  | 122.7(5) |
| N(1)  | Ir(1) | N(4)  | 85.50(15)  | C(18) | C(19) | C(20) | 118.7(5) |
| C(22) | Ir(1) | S(1)  | 175.88(13) | C(23) | C(24) | F(3)  | 118.6(5) |
| C(22) | Ir(1) | N(3)  | 94.45(17)  | C(25) | C(24) | F(3)  | 117.4(5) |
| C(22) | Ir(1) | N(4)  | 80.40(18)  | C(25) | C(24) | C(23) | 124.1(5) |
| C(22) | Ir(1) | N(1)  | 95.19(17)  | C(26) | C(27) | C(22) | 118.3(5) |
| C(11) | Ir(1) | S(1)  | 91.32(13)  | C(28) | C(27) | C(22) | 115.5(4) |
| C(11) | Ir(1) | N(3)  | 80.37(17)  | C(28) | C(27) | C(26) | 126.1(5) |
| C(11) | Ir(1) | N(4)  | 95.08(17)  | C(31) | C(32) | N(4)  | 121.8(5) |
| C(11) | Ir(1) | N(1)  | 179.17(17) | C(4)  | C(5)  | N(1)  | 122.1(5) |
| C(11) | Ir(1) | C(22) | 85.49(18)  | C(27) | C(26) | F(4)  | 120.5(5) |
| P(1)  | S(1)  | Ir(1) | 99.52(7)   | C(25) | C(26) | F(4)  | 116.5(5) |
| O(1)  | P(1)  | S(1)  | 116.58(19) | C(25) | C(26) | C(27) | 123.0(5) |
| C(1)  | P(1)  | S(1)  | 107.53(17) | N(1)  | C(1)  | P(1)  | 120.7(4) |
| C(1)  | P(1)  | O(1)  | 112.1(2)   | C(2)  | C(1)  | P(1)  | 118.0(4) |
| C(6)  | P(1)  | S(1)  | 106.35(19) | C(2)  | C(1)  | N(1)  | 121.3(5) |
| C(6)  | P(1)  | O(1)  | 111.7(3)   | C(26) | C(25) | C(24) | 116.4(5) |
| C(6)  | P(1)  | C(1)  | 101.3(3)   | C(8)  | C(7)  | C(6)  | 117.2(6) |
| C(17) | N(3)  | Ir(1) | 116.4(3)   | C(3)  | C(4)  | C(5)  | 119.4(6) |
| C(21) | N(3)  | Ir(1) | 125.0(3)   | C(27) | C(28) | N(4)  | 113.4(4) |
| C(21) | N(3)  | C(17) | 118.6(4)   | C(29) | C(28) | N(4)  | 120.0(5) |
| C(32) | N(4)  | Ir(1) | 123.8(4)   | C(29) | C(28) | C(27) | 126.5(5) |
| C(28) | N(4)  | Ir(1) | 116.4(3)   | C(2)  | C(3)  | C(4)  | 118.8(5) |
| C(28) | N(4)  | C(32) | 119.8(4)   | C(13) | C(14) | C(15) | 116.1(4) |
| C(5)  | N(1)  | Ir(1) | 120.4(3)   | C(19) | C(20) | C(21) | 119.3(5) |
| C(1)  | N(1)  | Ir(1) | 120.7(3)   | C(29) | C(30) | C(31) | 119.3(5) |
| C(1)  | N(1)  | C(5)  | 118.8(4)   | C(7)  | C(6)  | P(1)  | 116.1(4) |
| C(23) | C(22) | Ir(1) | 126.3(4)   | N(2)  | C(6)  | P(1)  | 118.9(5) |
| C(27) | C(22) | Ir(1) | 113.9(4)   | N(2)  | C(6)  | C(7)  | 124.9(6) |
| C(27) | C(22) | C(23) | 119.8(4)   | C(19) | C(18) | C(17) | 120.6(5) |

|       |       |       |          |       |       |       |          |
|-------|-------|-------|----------|-------|-------|-------|----------|
| C(16) | C(17) | N(3)  | 112.4(4) | C(3)  | C(2)  | C(1)  | 119.5(5) |
| C(18) | C(17) | N(3)  | 120.1(4) | C(10) | N(2)  | C(6)  | 116.9(7) |
| C(18) | C(17) | C(16) | 127.4(4) | C(30) | C(31) | C(32) | 119.3(5) |
| C(16) | C(11) | Ir(1) | 114.9(3) | C(30) | C(29) | C(28) | 119.7(6) |
| C(12) | C(11) | Ir(1) | 126.3(4) | C(12) | C(13) | F(2)  | 118.7(5) |
| C(12) | C(11) | C(16) | 118.8(4) | C(14) | C(13) | F(2)  | 117.2(4) |
| C(11) | C(16) | C(17) | 115.6(4) | C(14) | C(13) | C(12) | 124.0(5) |
| C(15) | C(16) | C(17) | 125.8(4) | C(9)  | C(8)  | C(7)  | 123.1(8) |
| C(15) | C(16) | C(11) | 118.5(4) | C(9)  | C(10) | N(2)  | 119.6(7) |
| C(24) | C(23) | C(22) | 118.4(5) | C(10) | C(9)  | C(8)  | 118.3(7) |

### S3. HPLC Data

Chiral HPLC has been used in optical resolution of Ir(dfppy)<sub>2</sub>(sdpp) to obtain the chiral Ir(III) complexes. HPLC Analysis Conditions: a) Column: Cat. No. EnantioPak®Y7, 5μm, 250 × 30 mm; b) Mobile phase: n-Hexane/Ethanol=80/20(v/v); c) Flow rate: 25.0 mL/min; d) Abs. detector: 254 nm.

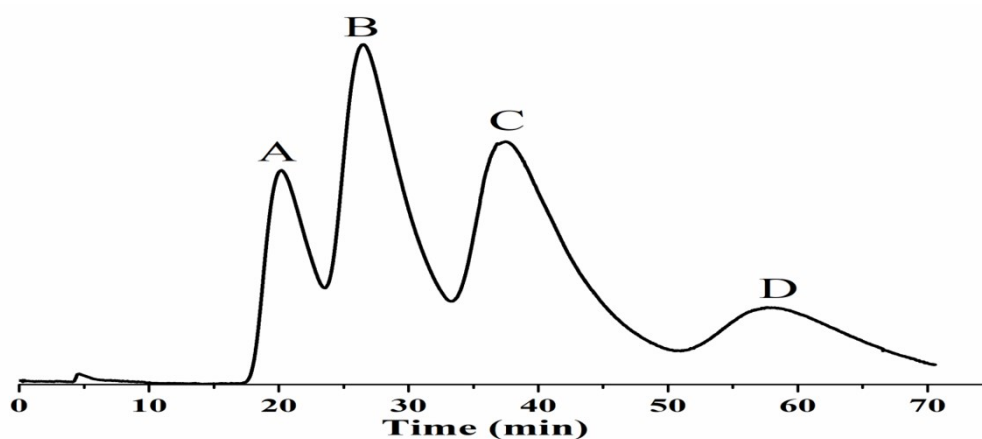

Fig. S13 HPLC profile of Ir(dfppy)<sub>2</sub>(sdpp).

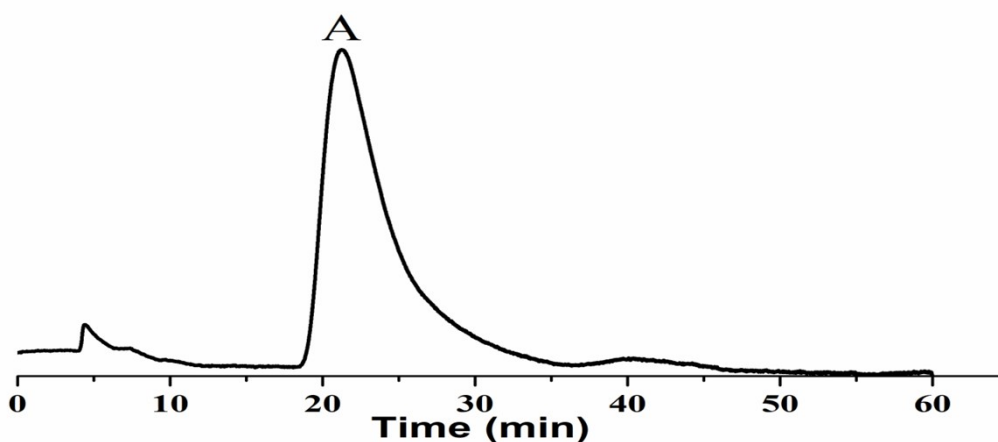

Fig. S14 HPLC profile of  $\delta$ -Ir(dfppy)<sub>2</sub>(R-sdpp).



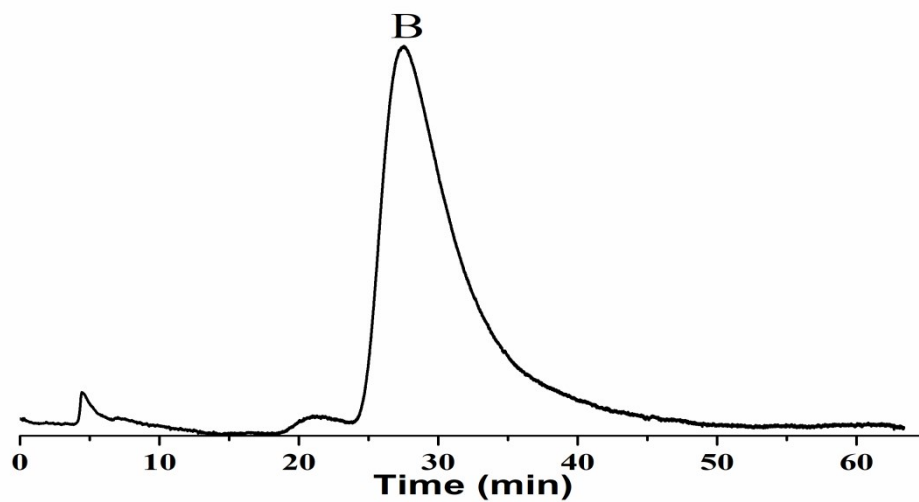

Fig. S15 HPLC profile of  $\lambda$ -Ir(dfppy)<sub>2</sub>(R-sdpp).

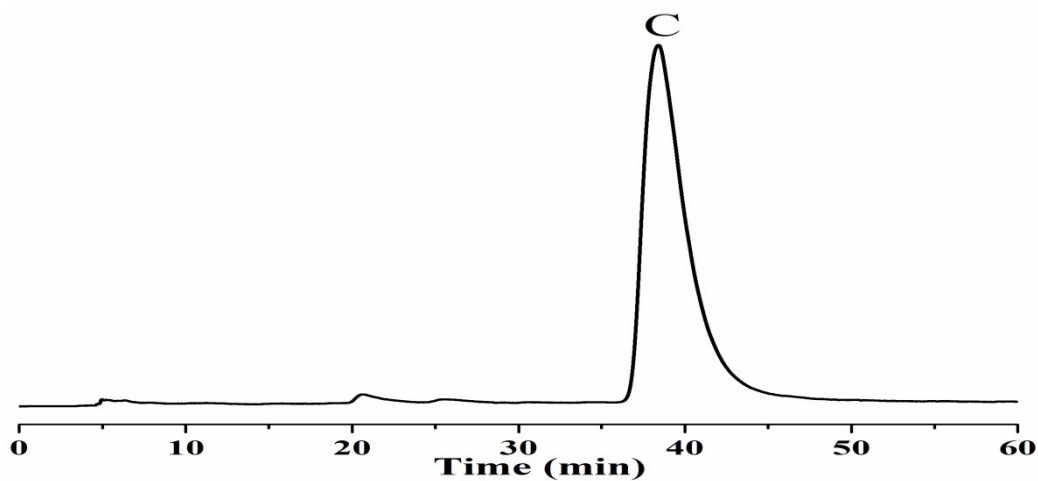

Fig. S16 HPLC profile of  $\lambda$ -Ir(dfppy)<sub>2</sub>(S-sdpp).

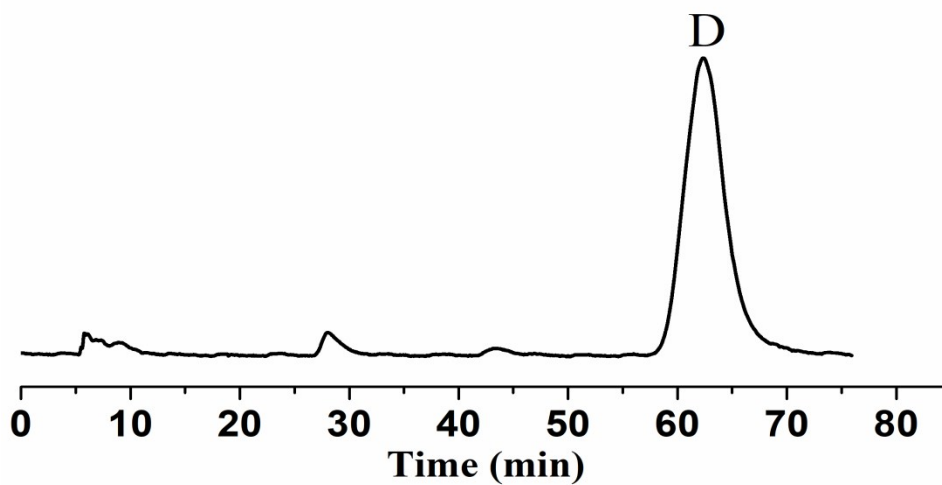

Fig. S17 HPLC profile of  $\delta$ -Ir(dfppy)<sub>2</sub>(S-sdpp).

## S4. Photophysical and chiral optical measurement

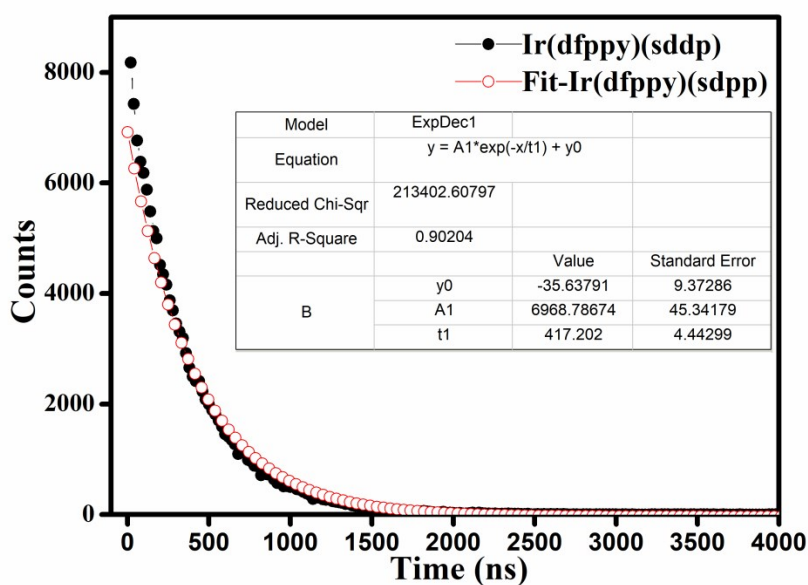

**Fig. S18** The lifetime curve of  $\text{Ir}(\text{dfppy})_2(\text{sdpp})$  in degassed  $\text{CH}_2\text{Cl}_2$  solution at room temperature.

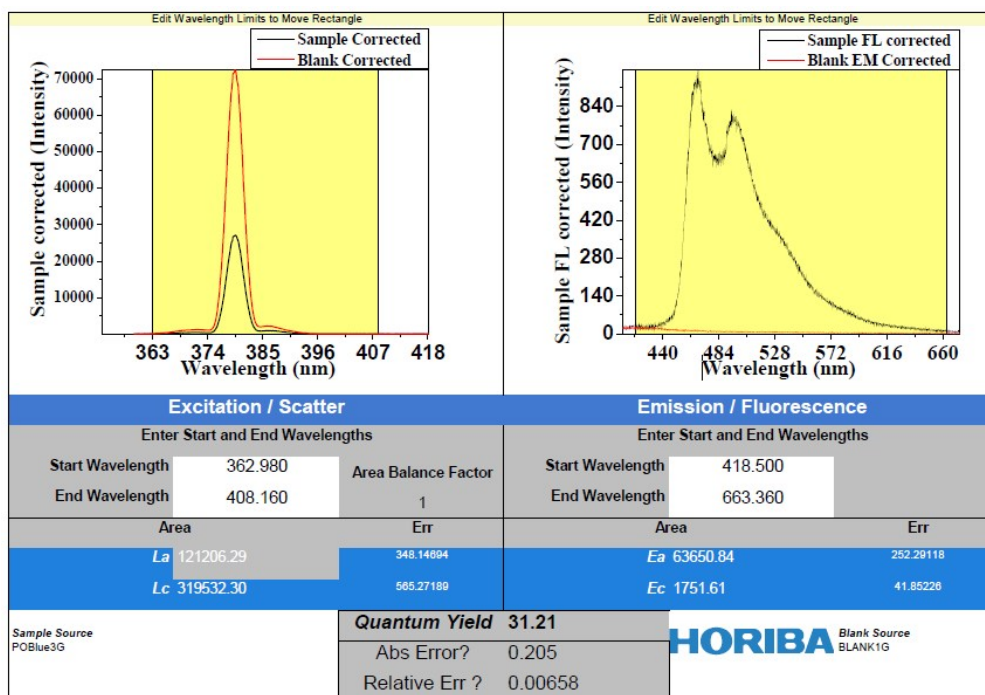

**Fig. S19** The quantum yield measurement of  $\text{Ir}(\text{dfppy})_2(\text{sdpp})$  in degassed  $\text{CH}_2\text{Cl}_2$  solution at room temperature.

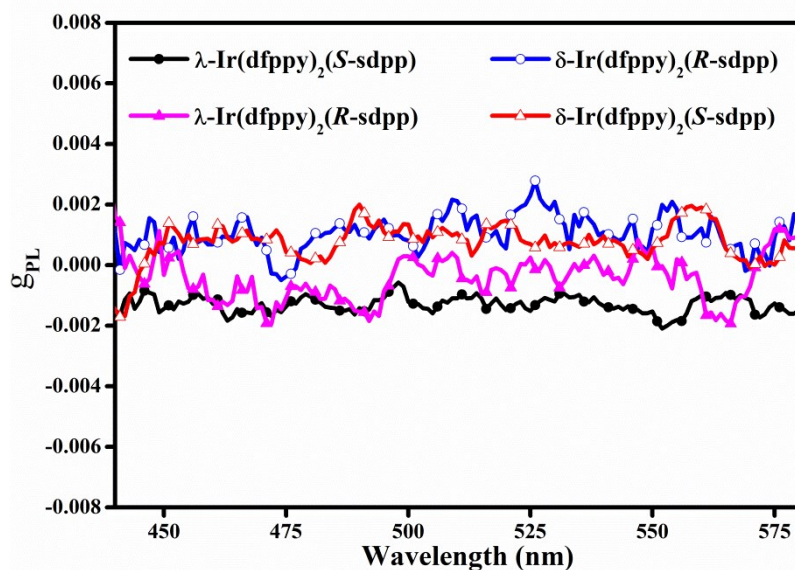

**Fig. S20**  $g_{PL}$  values of  $\lambda$ -Ir(dfppy)<sub>2</sub>(S-sdpp) and  $\delta$ -Ir(dfppy)<sub>2</sub>(R-sdpp),  $\lambda$ -Ir(dfppy)<sub>2</sub>(R-sdpp) and  $\delta$ -Ir(dfppy)<sub>2</sub>(S-sdpp) in degassed CH<sub>2</sub>Cl<sub>2</sub> solution.

## S5. Electrochemical measurement

Cyclic-voltammetry measurement system was performed at room temperature in deaerated CH<sub>2</sub>Cl<sub>2</sub>, employing a polished Pt plate as the working electrode, and tetra-*n*-butylammonium perchlorate (0.1M) as the supporting electrolyte, Fc<sup>+</sup>/Fc was used as the reference, with the scan rate of 0.1 V/s. The energy levels were calculated using the following equations: HOMO = -(4.8 +  $E_{ox}$ ) eV, LUMO = HOMO +  $E_g$ ,  $E_g$  was calculated from the UV-vis absorption spectrum.

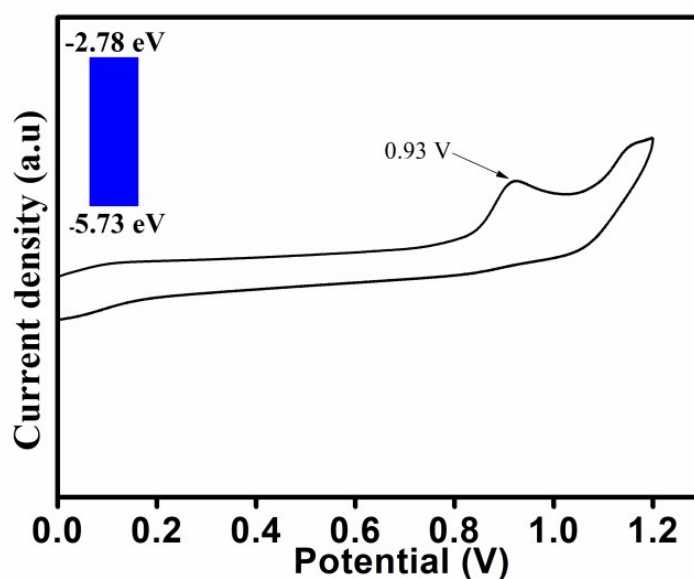

**Fig. S21** The cyclic voltammogram curve of Ir(dfppy)<sub>2</sub>(sdpp).

## S6. Theoretical calculation

**Table S7.** The calculated energy levels and spatial distributions of HOMO and LUMO of  $\lambda$ -Ir(dfppy)<sub>2</sub>(S-sdpp) and  $\delta$ -Ir(dfppy)<sub>2</sub>(R-sdpp),  $\lambda$ -Ir(dfppy)<sub>2</sub>(R-sdpp) and  $\delta$ -Ir(dfppy)<sub>2</sub>(S-sdpp).

| Complexes                                  | Orbital | Composition (%) |             |                  |
|--------------------------------------------|---------|-----------------|-------------|------------------|
|                                            |         | Ir              | Main ligand | Ancillary ligand |
| $\lambda$ -Ir(dfppy) <sub>2</sub> (S-sdpp) | HOMO    | 43.78           | 34.90       | 21.32            |
|                                            | LUMO    | 6.04            | 83.16       | 10.80            |
| $\delta$ -Ir(dfppy) <sub>2</sub> (R-sdpp)  | HOMO    | 43.80           | 33.98       | 22.22            |
|                                            | LUMO    | 6.04            | 83.02       | 10.94            |
| $\lambda$ -Ir(dfppy) <sub>2</sub> (R-sdpp) | HOMO    | 42.19           | 30.45       | 27.36            |
|                                            | LUMO    | 4.78            | 82.43       | 12.79            |
| $\delta$ -Ir(dfppy) <sub>2</sub> (S-sdpp)  | HOMO    | 42.18           | 30.56       | 27.26            |
|                                            | LUMO    | 4.78            | 86.65       | 8.57             |

## S7. Thermal stability

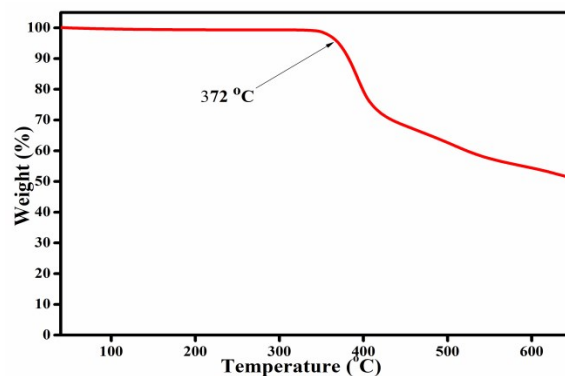

**Fig. S22** The TGA curve of Ir(dfppy)<sub>2</sub>(sdpp).

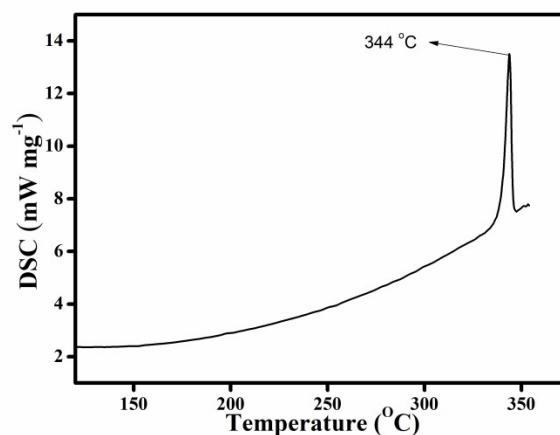

**Fig. S23** The DSC curve of Ir(dfppy)<sub>2</sub>(sdpp).

## S8. Device fabrication and characterization

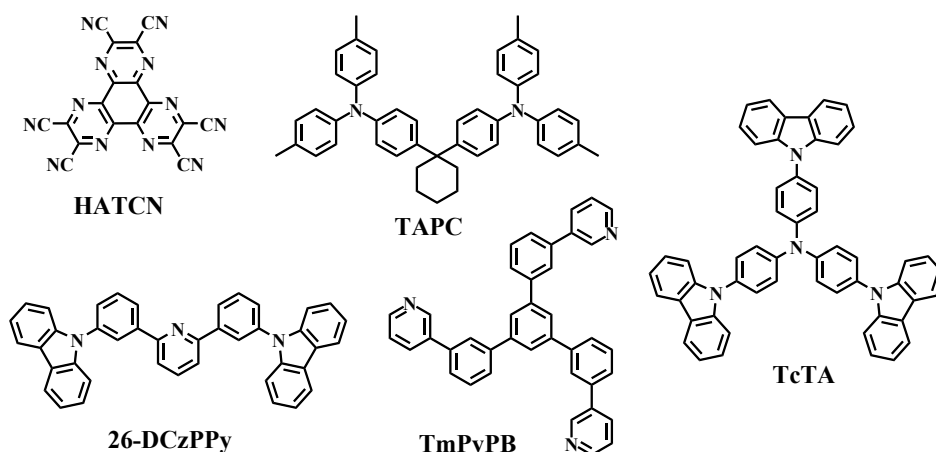

Fig. S24 The molecular structures of the compounds used in the device.

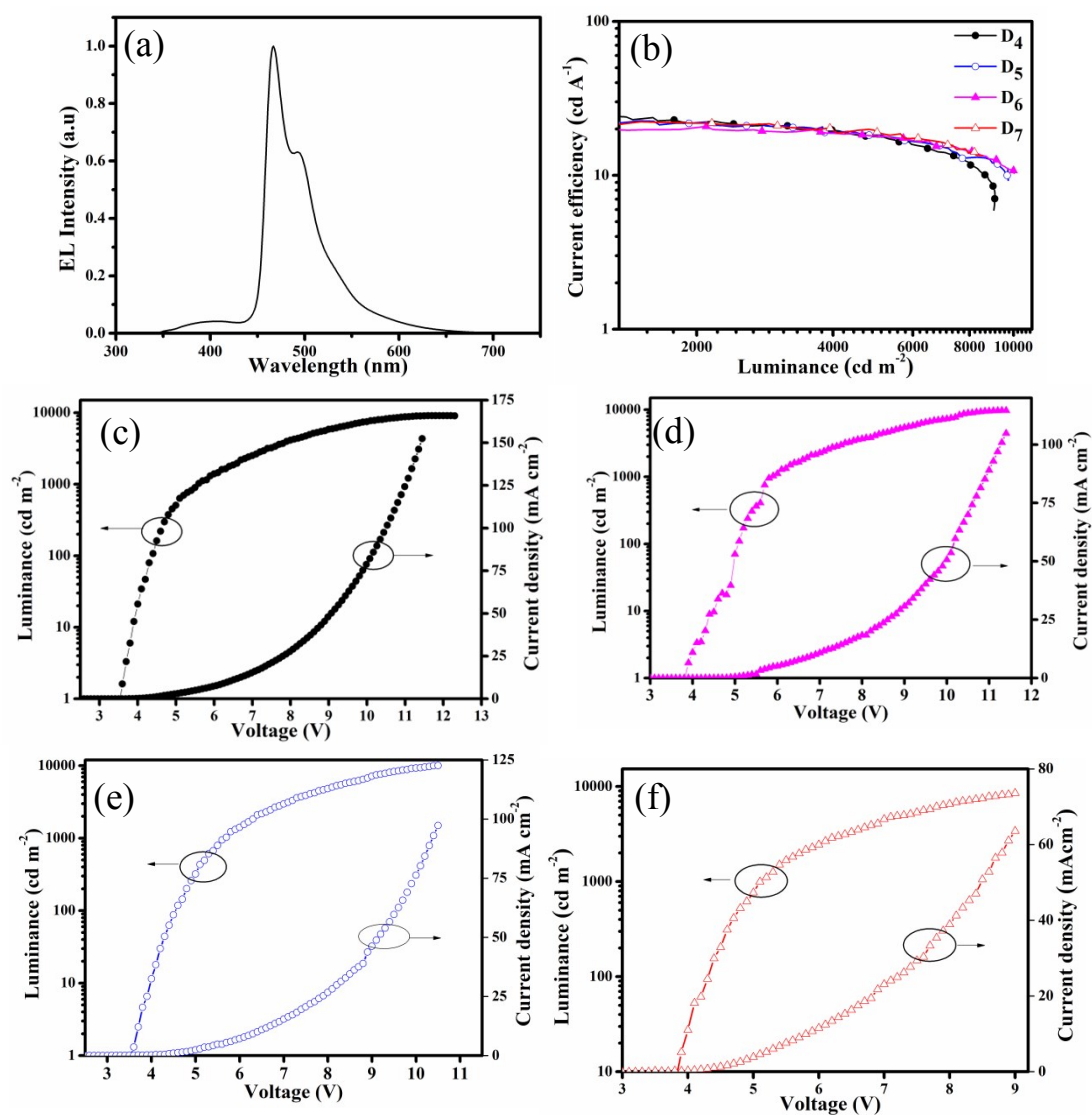

Fig. S25 (a) EL spectrum (6 V) of CP-OLEDs, (b) Current efficiency-Luminance curves, Luminance-voltage-current density performance of CP-OLEDs based on (c)  $\lambda$ -Ir(dfppy)<sub>2</sub>(S-sdpp) and  $\delta$ -Ir(dfppy)<sub>2</sub>(R-sdpp),  $\lambda$ -Ir(dfppy)<sub>2</sub>(R-sdpp) and  $\delta$ -Ir(dfppy)<sub>2</sub>(S-sdpp).

## S9. Reference

1. SAINT-Plus, version 6.02, Bruker Analytical X-ray System, Madison, WI, 1999.
2. G. M. Sheldrick, SADABS An empirical absorption correction program, Bruker Analytical X-ray Systems, Madison, WI, 1996.
3. G. M. Sheldrick, SHELXTL-2014, Universität of Göttingen, Göttingen, Germany, 2014.
4. O. V. Dolomanov, L. J. Bourhis, R. J. Gildea, J. A. K. Howard and H. Puschmann, "OLEX2: a complete structure solution, refinement and analysis program". *J. Appl. Cryst.*, 2009, 42, 339-341.
